# Supplementary material for: Exploring the structure and stability of pentameric amyloid β peptide aggregates in aqueous ammonium-based ionic liquid solutions
Source: Royal Society of Chemistry journal article supplement (doi:10.1039/d4cp04284k), 2025-01-01
Supplement: d4cp04284k1.pdf [file d4cp04284k1.pdf]

## Electronic Supplementary Information

### Exploring the structure and stability of pentameric amyloid $\beta$ peptide aggregate in aqueous ammonium-based ionic liquid solutions

Subhadip Sahoo<sup>a</sup> and Sanjoy Bandyopadhyay<sup>\*b</sup>

---

<sup>a</sup> Centre for Computational and Data Sciences, Indian Institute of Technology Kharagpur, Kharagpur - 721302, India

<sup>b</sup> Molecular Modeling Laboratory, Department of Chemistry, Indian Institute of Technology Kharagpur, Kharagpur - 721302, India; E-mail: sanjoy@chem.iitkgp.ac.in

**Table SI-1** Initial cell dimension, number of solvent and cosolvent molecules used during the center-of-mass (com) pulling simulation for  $A\beta$  pentameric system in pure aqueous and aqueous ammonium-based IL solution

| system | cell dimension( $\text{\AA}^3$ ) | solvent molecules |              |             |
|--------|----------------------------------|-------------------|--------------|-------------|
|        |                                  | $N_{Water}$       | $N_{Cation}$ | $N_{Anion}$ |
| TMAC   | $60 \times 50 \times 120$        | 8467              | 434          | 434         |
| ChoC   | $60 \times 50 \times 120$        | 7541              | 434          | 434         |
| TBAC   | $60 \times 50 \times 120$        | 4026              | 434          | 434         |
| Pure   | $60 \times 50 \times 120$        | 11251             | 0            | 0           |

**Table SI-2** Average interaction energies (in  $\text{kcal mol}^{-1}$ ) of water and ammonium-based IL components present at the exterior surface ( $\langle E^{surf} \rangle$ ) of the  $A\beta$  pentamer in pure aqueous medium and in binary water-IL solutions

| system | cation |        |        | anion |       |       | water |        |        |
|--------|--------|--------|--------|-------|-------|-------|-------|--------|--------|
|        | vdw    | elec   | tot    | vdw   | elec  | tot   | vdw   | elec   | tot    |
| TMAC   | -1.02  | -60.10 | -61.12 | -0.82 | 51.18 | 50.36 | -0.62 | -9.93  | -10.55 |
| ChoC   | -3.03  | -59.77 | -62.80 | -0.80 | 50.12 | 49.32 | -0.63 | -11.25 | -11.88 |
| TBAC   | -11.08 | -56.61 | -67.69 | -0.71 | 48.45 | 47.77 | -0.60 | -10.97 | -11.57 |
| Pure   | -      | -      | -      | -     | -     | -     | -0.52 | -9.37  | 9.89   |

**Table SI-3** Average interaction energies (in  $\text{kcal mol}^{-1}$ ) of water and ammonium-based IL components present inside the core ( $\langle E^{core} \rangle$ ) of the  $A\beta$  pentamers in pure aqueous medium and in binary water-IL solutions

| system | cation |        |        | anion |       |       | water |        |        |
|--------|--------|--------|--------|-------|-------|-------|-------|--------|--------|
|        | vdw    | elec   | tot    | vdw   | elec  | tot   | vdw   | elec   | tot    |
| TMAC   | -1.82  | -69.54 | -71.36 | -     | -     | -     | -0.78 | -15.46 | -16.24 |
| ChoC   | -4.23  | -74.02 | -78.80 | -0.90 | 49.32 | 48.42 | -0.80 | -17.44 | -18.24 |
| TBAC   | -13.23 | -70.79 | -84.02 | -0.92 | 53.3  | 52.38 | -0.78 | -18.23 | -19.01 |
| Pure   | -      | -      | -      | -     | -     | -     | -0.72 | -12.5  | -13.22 |

**Table SI-4** Average side-chain interaction energies (in kcal mol<sup>-1</sup>) of positive, negative, polar and non-polar residues of the A $\beta$  pentamer with water and the ammonium-based IL components ( $\langle E^{res} \rangle$ ) in pure aqueous medium and in binary water-IL solutions

| residue  | TMAC    |        |       | ChoC    |        |       | TBAC    |        |       | Pure  |
|----------|---------|--------|-------|---------|--------|-------|---------|--------|-------|-------|
|          | cation  | anion  | water | cation  | anion  | water | cation  | anion  | water | water |
| positive | 86.33   | -78.40 | -3.87 | 82.77   | -84.27 | -2.63 | 76.50   | -92.40 | -5.89 | -3.23 |
| negative | -187.08 | 150.34 | -6.73 | -151.73 | 157.02 | -4.44 | -157.72 | 163.53 | -5.24 | -4.28 |
| polar    | -1.62   | -2.93  | -3.84 | -2.66   | -7.95  | -4.44 | -2.24   | -11.90 | -5.58 | -3.23 |
| nonpolar | -3.72   | 0.64   | -6.02 | -6.68   | -0.97  | -5.98 | -9.63   | -5.56  | -7.21 | -2.23 |

**Table SI-5** Average number of protein-water hydrogen bonds ( $N_{PW}$ ) formed around different peptide segments (N-term, turn, and C-term) for the A $\beta$  pentamer in presence of different ammonium-based IL solution. For comparison the data in pure aqueous solution are included

| system | $N_{PW}$           |                     |                    |
|--------|--------------------|---------------------|--------------------|
|        | N-term             | turn                | C-term             |
| TMAC   | 65.93( $\pm$ 6.27) | 34.56( $\pm$ 3.54)  | 38.84( $\pm$ 3.29) |
| ChoC   | 64.33( $\pm$ 4.19) | 31.11 ( $\pm$ 3.12) | 33.43( $\pm$ 3.12) |
| TBAC   | 60.17( $\pm$ 5.30) | 19.02( $\pm$ 3.27)  | 26.58( $\pm$ 3.16) |
| Pure   | 86.93( $\pm$ 5.02) | 39.98( $\pm$ 3.13)  | 46.00( $\pm$ 3.33) |

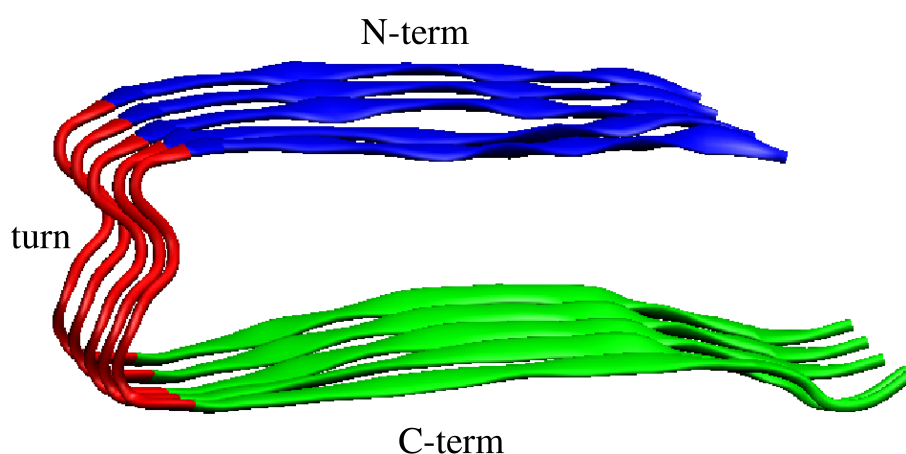

**Fig. SI-1** A schematic representation of pentameric form of A $\beta$  oligomer. For, visual clarity different segments of the monomers in the oligomer are color-coded differently, where Nterm, turn and Cterm are marked in blue, red and green colour respectively.

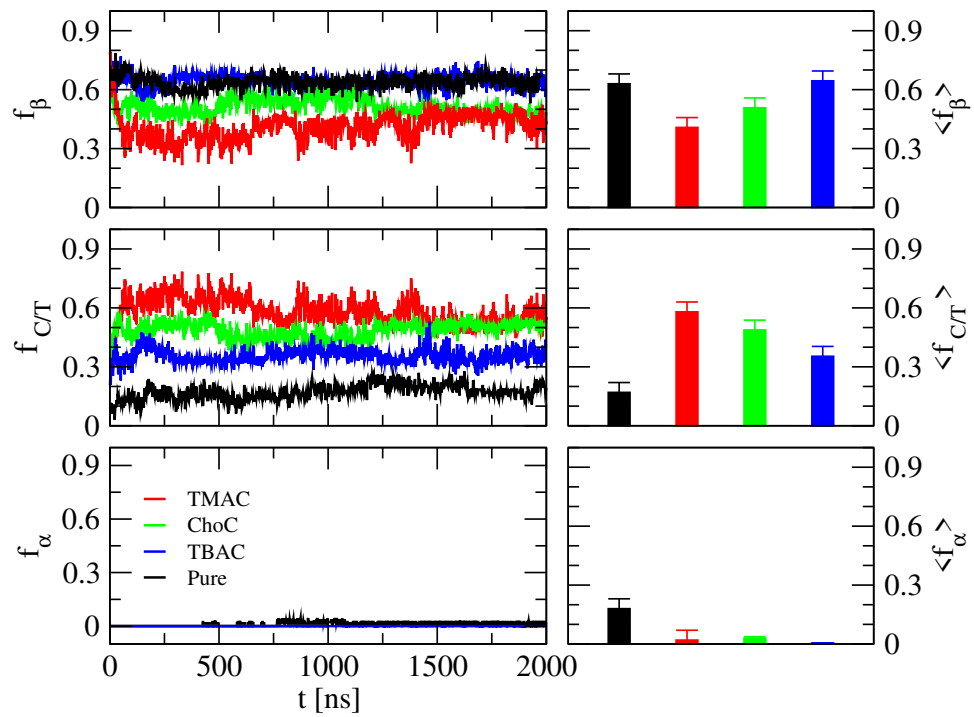

**Fig. SI-2** Time evolutions of the fractions of  $\beta$ -strand, turn/coil and  $\alpha$ -helical contents of the A $\beta$  oligomer in pure aqueous medium and in binary water-IL solutions.

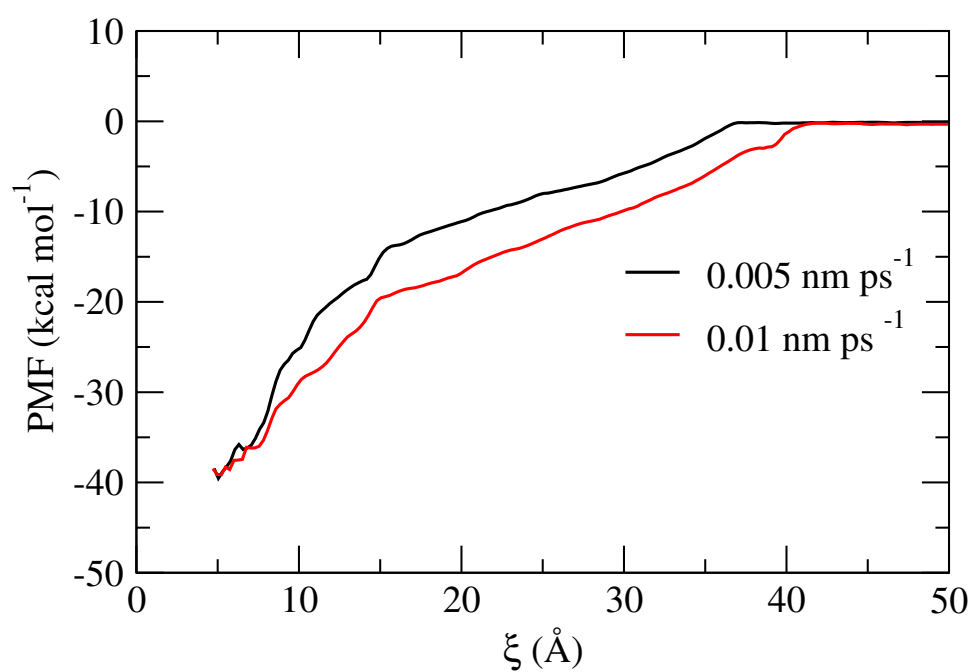

**Fig. SI-3** Variation of the potential of mean force (PMF) along the reaction coordinate for A $\beta$  Pentamer in pure aqueous solution by employing different pulling speeds.
